# Supplementary material for: Long noncoding RNA HITT coordinates with RGS2 to inhibit PD-L1 translation in T cell immunity
Source: J Clin Invest. 2023 Jun 1;133(11):e162951. doi: 10.1172/JCI162951 (PMC10231998; doi:10.1172/JCI162951)
Supplement: Supplemental data [file jci-133-162951-s087.pdf]

## **Long noncoding RNA HITT coordinates with RGS2 to inhibit PD-L1 translation in T cell immunity**

Qingyu Lin<sup>1\*</sup>, Tong Liu<sup>2\*</sup>, Xingwen Wang<sup>1</sup>, Guixue Hou<sup>3</sup>, Zhiyuan Xiang<sup>1</sup>, Wenxin Zhang<sup>1</sup>, Shanliang Zheng<sup>1</sup>, Dong Zhao<sup>1</sup>, Qibin Leng<sup>4</sup>, Xiaoshi Zhang<sup>5</sup>, Minqiao Lu<sup>1</sup>, Tianqi Guan<sup>1</sup>, Hao Liu<sup>1</sup>, Ying Hu<sup>1#</sup>

1 School of Life Science and Technology, Harbin Institute of Technology, Harbin, Heilongjiang Province, China, 150001

2 Department of Breast Surgery, Harbin Medical University Cancer Hospital, Harbin, China; Heilongjiang Academy of Medical Sciences, Harbin, China.

3 BGI-SHENZHEN, Shenzhen, 518083, China.

4 Affiliated Cancer Hospital and Institute of Guangzhou Medical University, State Key Laboratory of Respiratory Disease, 78 Heng Zhi Gang Road, Guangzhou 510095, China.

5 Department of Clinical Laboratory, Qilu Hospital of Shandong University, Jinan, Shandong, China 250012

Conflict of interest: The authors have declared that no conflict of interest exists.

\* These authors contribute equally to the work.

Address correspondence to: School of Life Science and Technology, Harbin Institute of Technology, 150001 Harbin, Heilongjiang Province, China. Tel: 0086-86403826. Email: huying@hit.edu.cn.

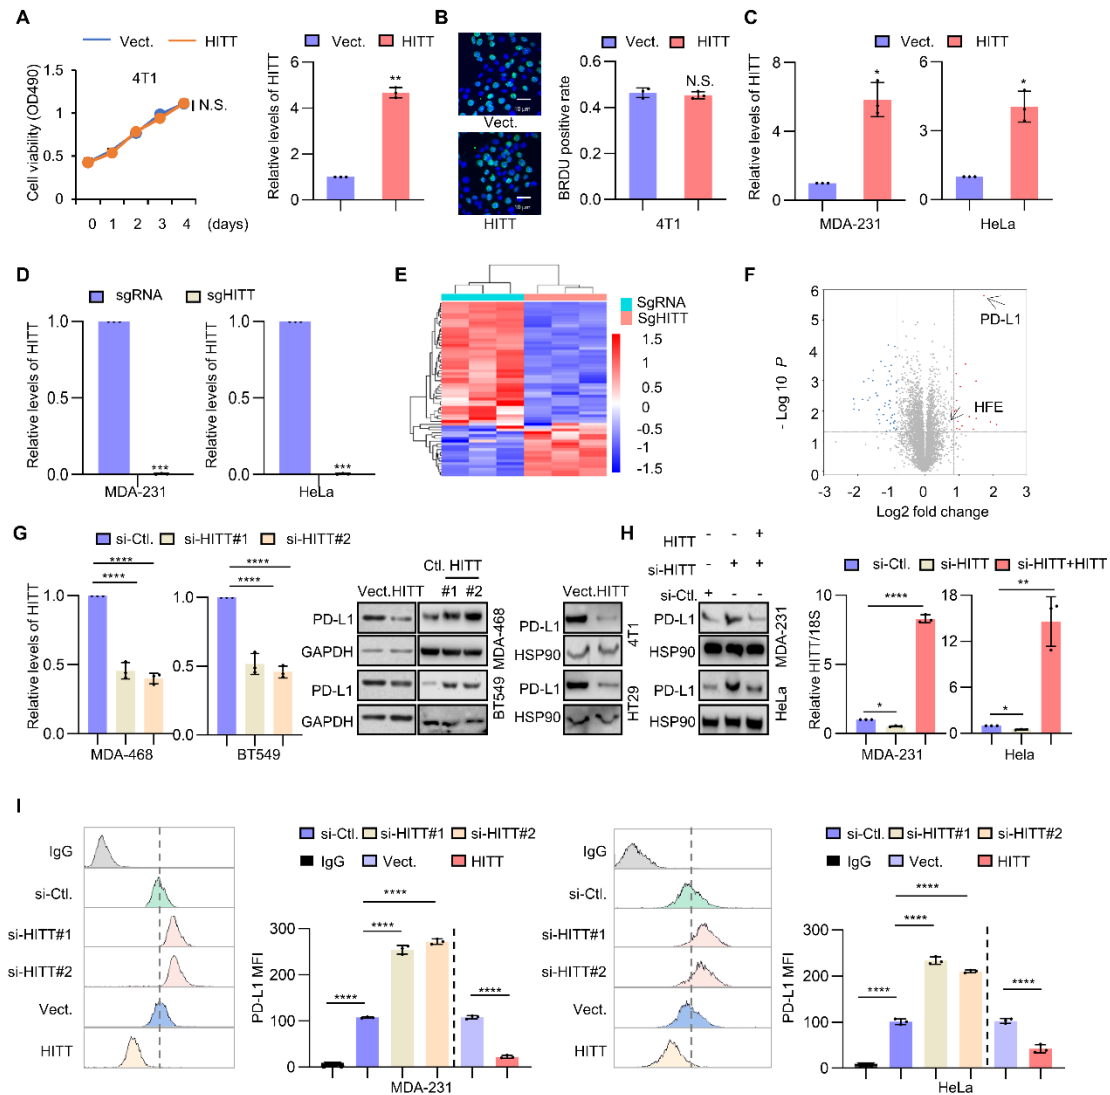

**Supplemental Figure 1 HITT inhibits PD-L1 expression.**

(A and B) The viability and proliferation rate of 4T1 cells were measured by MTT (A) and BrdU incorporation assays (B) after stable transfection of HITT or vector control. (C and D) HITT overexpression (C) and knockout (KO) (D) efficiencies were confirmed by qRT-PCR in MDA-231 and HeLa cells. (E) A clustering heatmap illustrating the differentially expressed protein classifications of SgRNA and SgHITT samples. The different color represents protein different expression levels of SgHITT group compared to the SgRNA group. (F) Volcano plot for the comparison differentially expressed proteins between the SgRNA group and SgHITT group. The cutoff values fold change >1.8 and  $P$  value < 0.05 were utilized to identify differentially expressed proteins. Non-changed proteins were shown in grey color. Red color is indicative of up-regulated proteins and blue is indicative of

down-regulated proteins. **(G)** PD-L1 levels were measured by western blot assay in MDA-468, BT549, HT29 and 4T1 cells after overexpression or KD HITT. **(H)** PD-L1 protein levels were analyzed by western blot (left) and HITT KD and recovery efficiency were confirmed by qRT-PCR (right). **(I)** PD-L1 levels were determined by measuring membrane PD-L1 through flow cytometry. Data are derived from three independent experiments shown as mean  $\pm$  SEM. \* $P < 0.05$ ; \*\* $P < 0.01$ ; \*\*\* $P < 0.001$ ; \*\*\*\* $P < 0.0001$ ; N.S. not significant by two-way ANOVA test **(A)** and Student's t test **(A-D)** and one-way ANOVA test **(G-I)**.

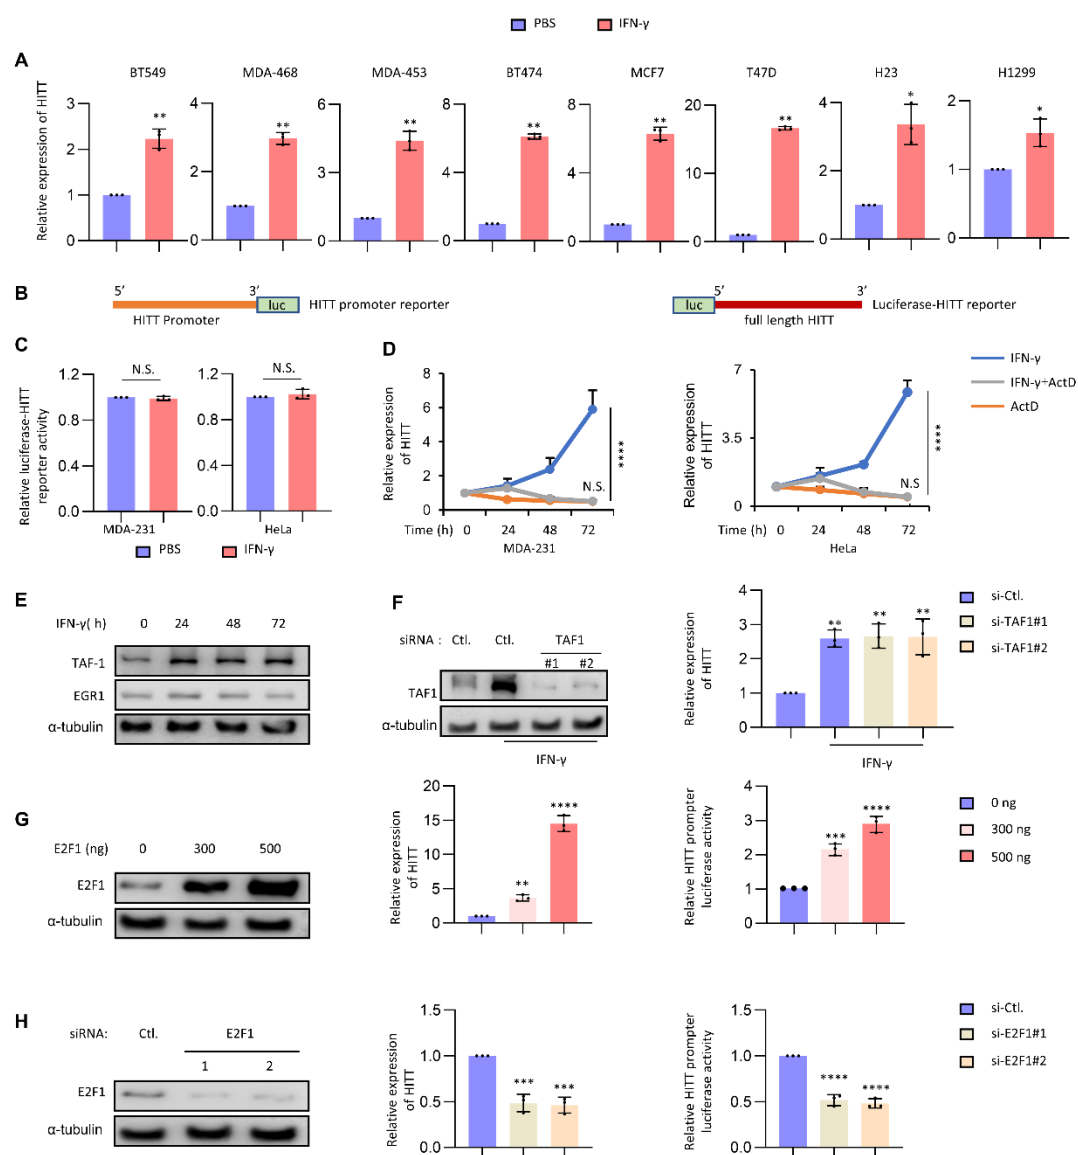

**Supplemental Figure 2 HITT is induced by E2F1 under the IFN-γ treatment**

(A) HITT levels were measured by qRT-PCR in different cancer cell lines under the treatment of 10ng/ml IFN-γ for 24h. (B) Schematic of HITT promoter-driven luciferase reporter (HITT promoter reporter) and luciferase-full length HITT reporter (luciferase-HITT reporter) constructs. (C) Luciferase-HITT reporter activities were measured by luciferase reporter assay in MDA-231 and HeLa cells under the treatment of 10ng/ml IFN-γ for 24h. (D) HITT levels were measured in MDA-231 and HeLa cells by qRT-PCR after treatment of different time periods of IFN-γ (10ng/ml) in the presence or absence of RNA synthesis inhibitor Actinomycin D (ActD). (E) The protein levels of TAF1 and EGR1 were determined by western blot following the treatment of IFN-γ (10ng/ml) in HeLa cells for the different time periods. (F) HITT levels were measured by qRT-PCR in TAF1 knockdown

(KD) HeLa cells in the presence of IFN- $\gamma$  (10ng/ml for 24h). (**G** and **H**) HITT levels and HITT promoter luciferase activities were measured by qRT-PCR and luciferase reporter assay, respectively, following introducing ascending levels of E2F1 by transfection with 0, 300 or 500ng expression plasmid of E2F1 (**G**) or E2F1 KD (**H**) in HeLa cells. The overexpression (left, **G**) or KD (left, **H**) efficiency of E2F1 was determined by western blot assay. Data are derived from three independent experiments shown as mean  $\pm$  SEM. \* $P < 0.05$ ; \*\* $P < 0.01$ ; \*\*\* $P < 0.001$ ; \*\*\*\* $P < 0.0001$ ; N.S. not significant by Student's t test (**A**, **C**) and two-way ANOVA test (**D**) and one-way ANOVA test (**F-H**).

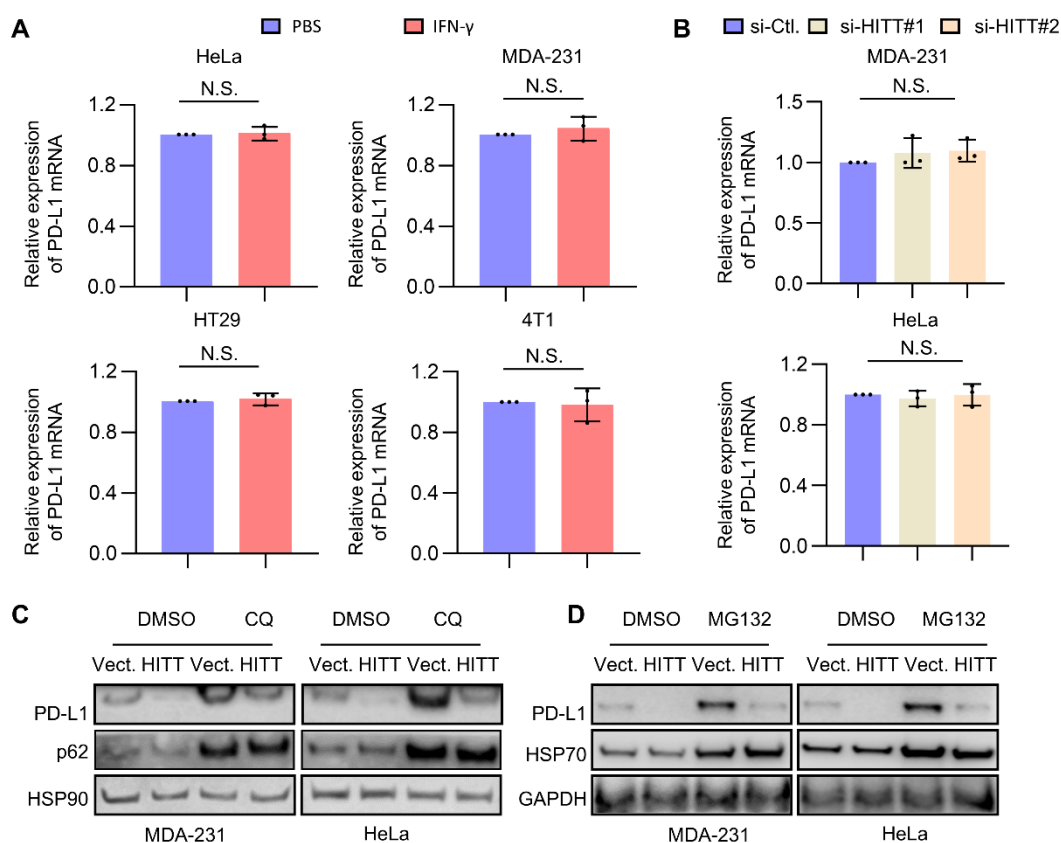

### Supplemental Figure 3 HITT limits PD-L1 translation

(**A** and **B**) PD-L1 mRNA levels were measured by qRT-PCR in HITT stable lines (**A**) or HITT KD (**B**) cells as indicated. (**C** and **D**) PD-L1 levels were measured by western blot in HITT stable lines or HITT KD cells in the presence or absence of Chloroquine (CQ) (**C**) or MG132 (**D**). Data are derived from three independent experiments shown as mean  $\pm$  SEM. N.S. not significant by Student's t test (**A**) and one-way ANOVA test (**B**).

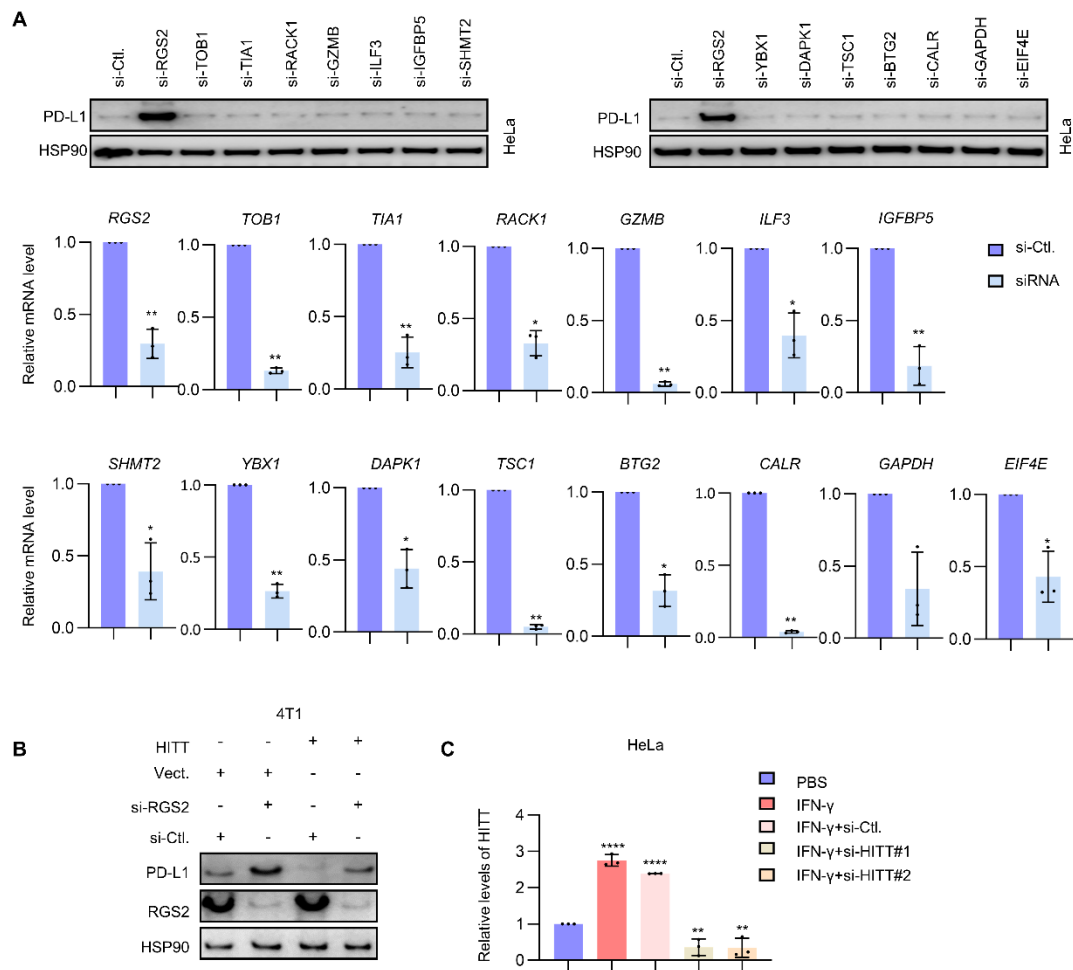

#### Supplemental Figure 4 HITT inhibits PD-L1 expression dependently on RGS2

(A) PD-L1 levels were measured by western blot following small interfering RNA (siRNA)-mediated genetic KD of the indicated targets (up). KD efficiencies were verified by qRT-PCR (bottom). (B) PD-L1 level was measured by western blot in 4T1 cells with or without RGS2 KD and/or HITT overexpression. (C) Expression rates of HITT were determined by qRT-PCR in HeLa cells used in Figure 4C and Figure 6A and representative data were present in C. Data are derived from three independent experiments shown as mean  $\pm$  SEM. \* $P < 0.05$ ; \*\* $P < 0.01$ ; \*\*\*\* $P < 0.0001$  by Student's t test (A) and one-way ANOVA test (C).

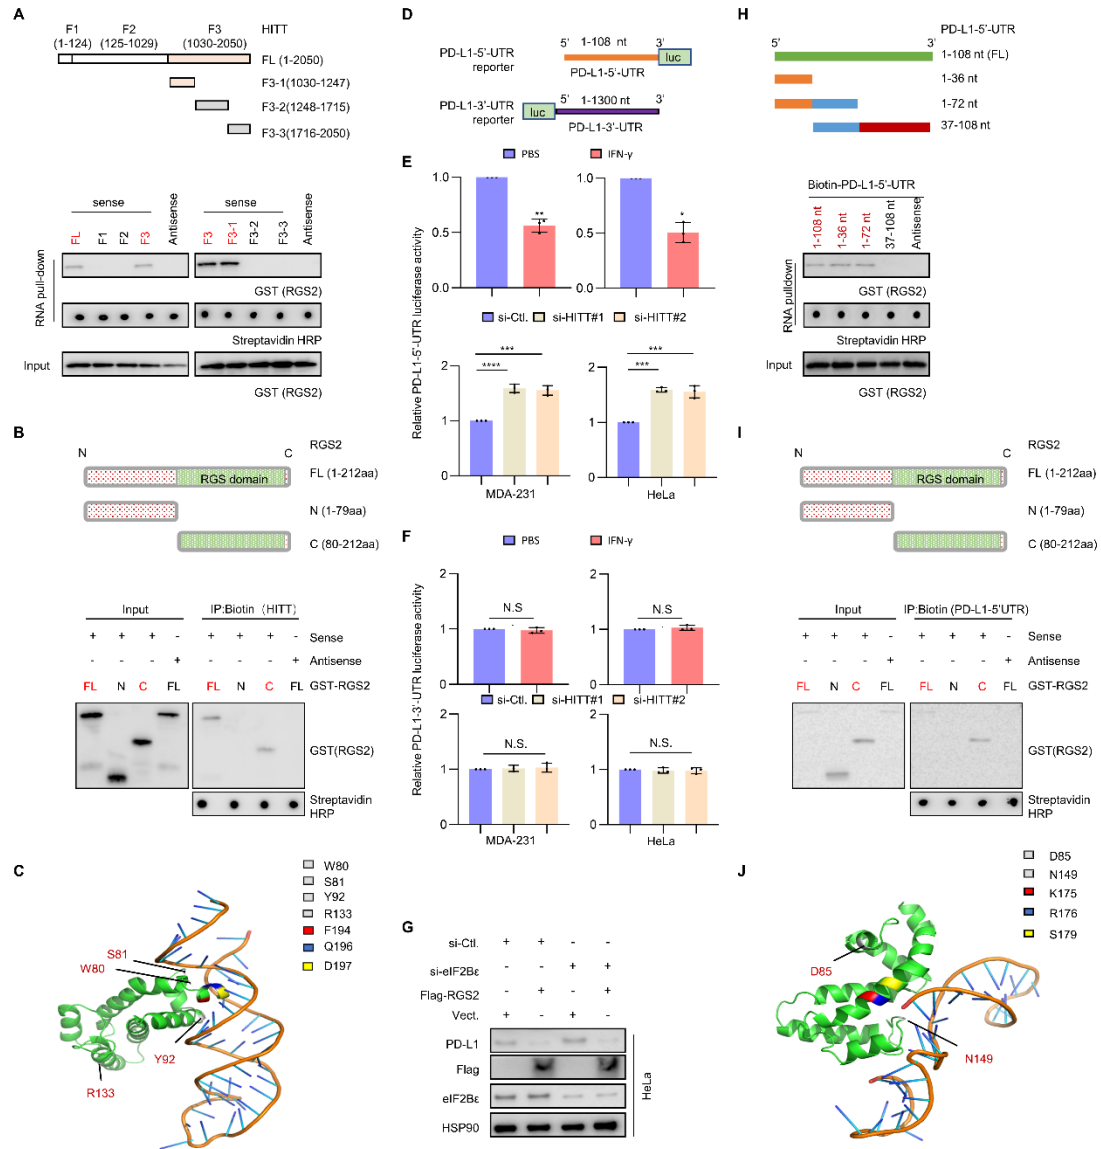

**Supplemental Figure 5 The interaction mechanisms of HITT/PD-L1 5'-UTR/RGS2**

(A and B) GST-tagged full length (FL) RGS2 protein (A) or its truncates (B) pulled down by Biotin-HITT (FL and HITT fragments) or Biotin-Antisense-HITT control were determined by western blot. Schematic showing HITT or RGS2 fragmented constructs in relation to FL HITT or RGS2 were shown in upper panels, respectively in A and B. (C) Representative model of RGS2 (80-212 aa)/HITT F3-1 (1080-1130 nt) complex predicted by HDOCK docking software. Seven most potential residues in mediating the binding with HITT F3-1 (1080-1130 nt) were highlighted in different colors. (D) Schematic of PD-L1 5'-UTR and PD-L1 3'-UTR luciferase reporter constructs. (E and F) PD-L1 5'-UTR- (E) and PD-L1 3'-UTR- (F) controlled luciferase activities were determined by luciferase reporter assay in HITT overexpression stable lines or HITT KD cells. (G) PD-L1 levels were measured

by western blot under the indicated conditions. (**H** and **I**) GST-tagged-FL RGS2 protein (**H**) or its truncates (**I**) pulled down by Biotin-PD-L1-5'-UTR (FL and PD-L1-5'-UTR fragments) or Biotin-Antisense-PD-L1-5'-UTR control were determined by western blot. Schematic showing PD-L1-5'-UTR (**H**) or RGS2 fragmented (**I**) constructs in the upper panels, respectively. (**J**) Representative model of RGS2 (80-212 aa)/5'-UTR (1-36 nt) complex was predicted by HDOCK docking software. Five most potential residues in mediating the binding with 5'-UTR (1-36 nt) were highlighted in different colors. Data are derived from three independent experiments shown as mean  $\pm$  SEM. \* $P$  < 0.05; \*\* $P$  < 0.01; \*\*\* $P$  < 0.001; \*\*\*\* $P$  < 0.0001; N.S. not significant by Student's  $t$  test (**E**, **F**) and one-way ANOVA test (**E**, **F**).

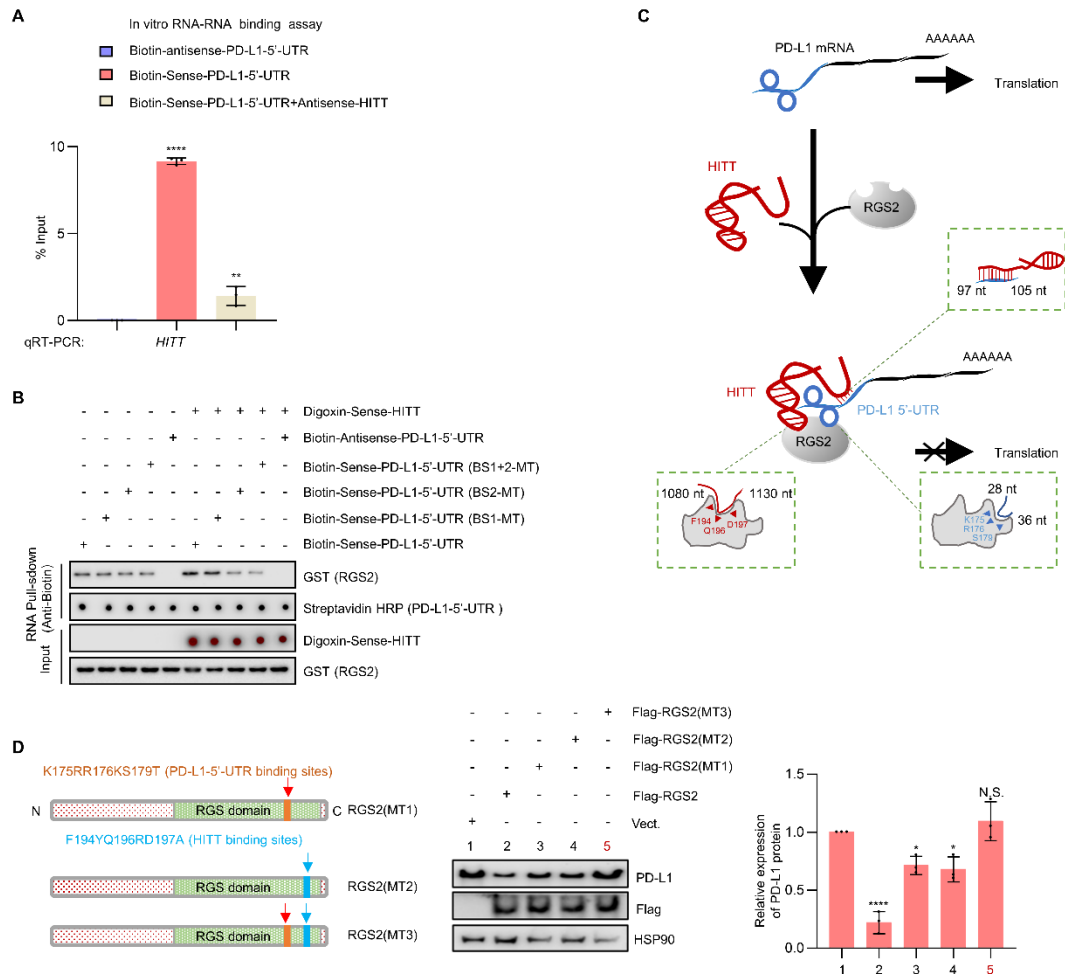

**Supplemental Figure 6 HITT/PD-L1 5'-UTR/RGS2 interact with each other**

(A) HITT co-precipitated by Biotin-PD-L1-5'-UTR or Biotin-Antisense-PD-L1-5'-UTR control was determined by qRT-PCR with or without Antisense-HITT. (B) GST-labeled full length (FL) RGS2 protein pulled down by Biotin-PD-L1-5'-UTR, -PD-L1-5'-UTR (BS1-MT), -PD-L1-5'-UTR (BS2-MT), -PD-L1-5'-UTR (BS1+2-MT) or Biotin-Antisense-PD-L1-5'-UTR control were determined by RNA pull down assay. (C) A schematic of molecular mechanisms underlying RGS2/HITT-inhibited PD-L1 translation. HITT (1080-1130 nt) and PD-L1-5'-UTR (28-36 nt) are essential for their binding with RGS2 at F194, Q196, D197 and K175, R176, S179, respectively. HITT (1030-1247 nt) also forms RNA-RNA duplex with PD-L1-5'-UTR (BS2-MT, 97-105 nt). These interactions are essential to attenuate the translation rate of PD-L1. (D) PD-L1 protein levels were analyzed by western blot assay in HeLa cells transfected with flag tagged RGS2 WT or its mutants (RGS2 MT1: K175RR176KS179T; RGS2 MT2: F194YQ196RD197A and RGS2 MT3: K175RR176KS179TF194YQ196RD197A). The PD-L1

intensities were quantified and shown in bar graph. Data are derived from three independent experiments shown as mean  $\pm$  SEM. \* $P < 0.05$ ; \*\* $P < 0.01$ ; \*\*\* $P < 0.001$ ; \*\*\*\* $P < 0.0001$ ; N.S. not significant by one-way ANOVA test (**A, D**).

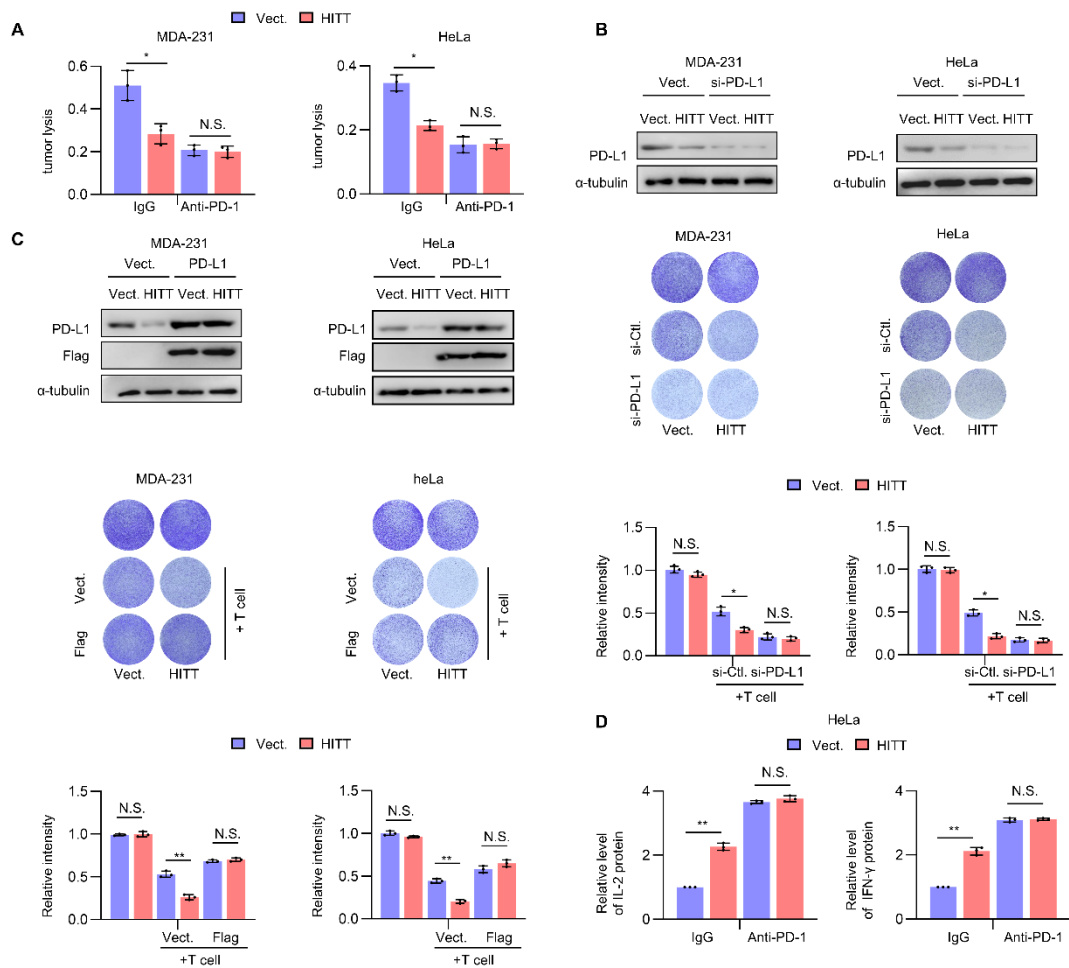

**Supplemental Figure 7 PD-L1 reduction is required for the increased anti-tumour immunity mediated by HITT**

(A) The viabilities of MDA-231 and Hela cells were determined by MTS assay following co-culture cancer cells with the activated T cell for 6h in the presence of IgG control or anti-PD-1 antibody after the HITT overexpression. (B, C) The attached survival MDA-231 or HeLa cells were detected by crystal violet staining following co-culture cancer cells with the activated T cell for 6h after the HITT overexpression with or without PD-L1 KD (B) or overexpression (C). The intensities were quantified and the relative levels were shown in bar graph (bottom). PD-L1 KD and overexpression efficiencies were determined by western blot (upper). (D) Detection of IL-2 and IFN- $\gamma$  levels in the supernatants from the co-cultures of T-cell and cancer cell in the presence of absence of IgG control or anti-PD-1 antibody by ELISA assays. Data are derived from three independent

experiments shown as mean  $\pm$  SEM. \* $P < 0.05$ ; \*\* $P < 0.01$ ; N.S. not significant by Student's t test

**(A-D).**

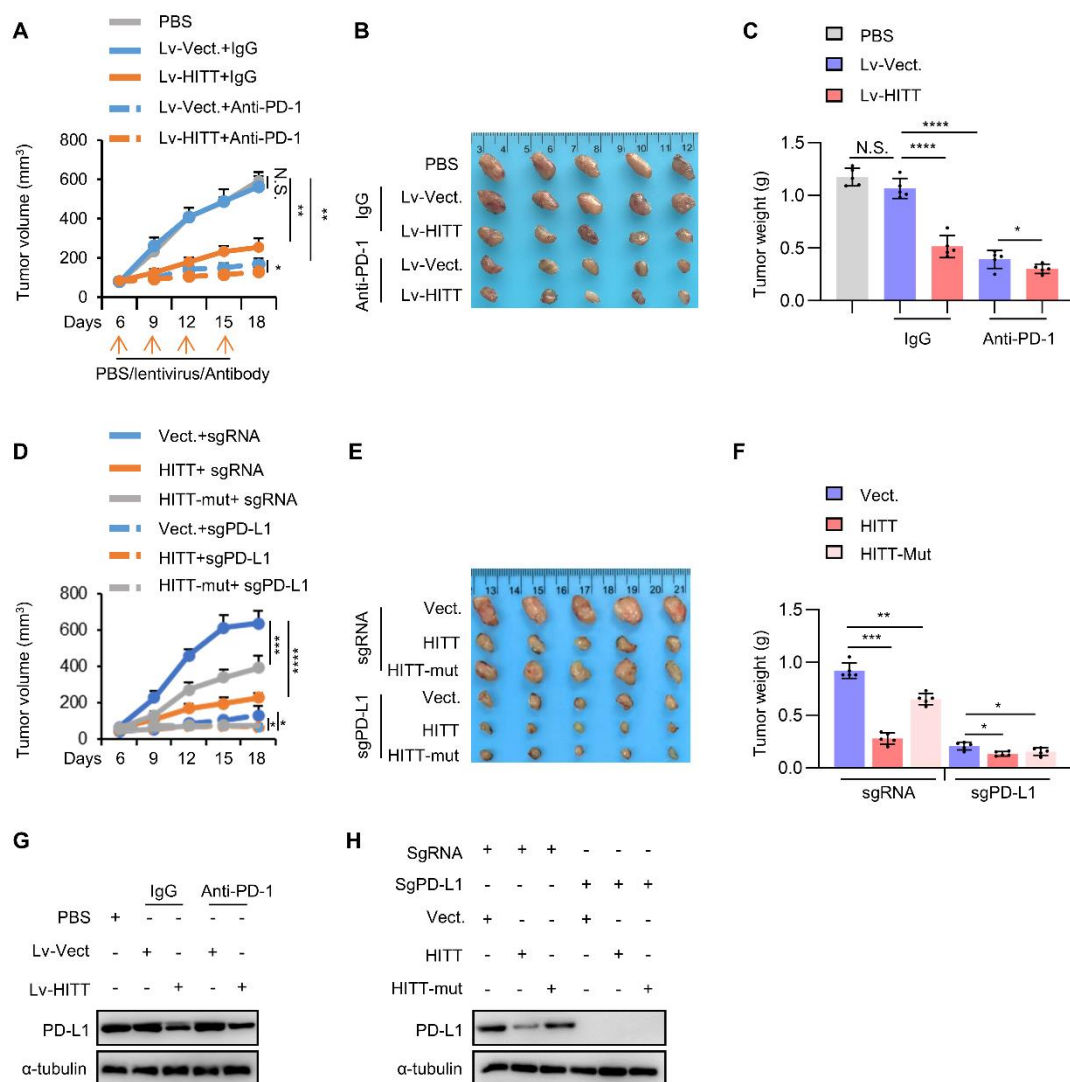

**Supplemental Figure 8 HITT sensitizes cancer cells to T cell-mediated cytotoxicity through inhibiting PD-L1 expression**

(A-C) 4T1 syngeneic tumors in immune-competent BALB/c mice were monitored following the administration of IgG control or anti-CD8 $\alpha$  antibody and introducing PBS, control and HITT expressing lenti-virus. The tumour volume (A) and images of syngeneic tumor (B), and the tumor weight (C) were shown respectively. Each dot represents an evaluation in an individual tumor. (D-F) The tumour volume (D) and images of syngeneic tumor (E), and the tumor weight (F) of the 4T1/Vect, 4T1/HITT, 4T1/HITT-Mut, 4T1/Vect/PD-L1 KO, 4T1/HITT/PD-L1 KO, 4T1/HITT-Mut/PD-L1 KO syngeneic tumors in immune-competent BALB/c mice were shown respectively. Each dot represents an evaluation in an individual tumor. (G) PD-L1 protein of tumor samples from PBS,

lenti-Vect+IgG, lenti-HITT+IgG, Lenti-Vect+anti-PD-1, lenti-HITT+anti-PD-1 groups were determined by western blot. (H) PD-L1 protein levels were measured in 4T1/Vect, 4T1/HITT, 4T1/HITT-Mut, 4T1/Vect/PD-L1 KO, 4T1/HITT/PD-L1 KO, 4T1/HITT-Mut/PD-L1 KO six groups. HITT-Mut indicated the PD-L1 mRNA binding defective HITT. Data in **A**, **C**, **D** and **F** are shown as mean  $\pm$  SD. \* $P < 0.05$ ; \*\* $P < 0.01$ ; \*\*\* $P < 0.001$ ; \*\*\*\* $P < 0.0001$ ; N.S. not significant by two-way ANOVA test (**A**, **D**,  $n=5$  mice per group) and one-way ANOVA test (**C**, **F**  $n=5$  mice per group).

**Supplemental Table 1. Gene background of cancer cell lines treated with IFN- $\gamma$ .**

| <b>Cell line</b> | <b>TNBC</b> | <b>Metastatic</b>    |
|------------------|-------------|----------------------|
| MDA-MB-231       | YES         | Pleural effusion     |
| MDA-MB-453       | NO          | Pericardial effusion |
| MDA-MB-468       | YES         | Pleural effusion     |
| BT549            | YES         | Pleural effusion     |
| MCF7             | NO          | Pleural effusion     |
| T47D             | NO          | Pleural effusion     |

**Supplemental Table 2. Proteins have been annotated to negatively regulate protein translation in Gene Ontology database.**

| UnprotKB Accession | Gene                | UnprotKB         | Gene   |
|--------------------|---------------------|------------------|--------|
| UniProtKB:P41220   | RGS2 <sup>1</sup>   | UniProtKB:Q9BWF3 | RBM4   |
| UniProtKB:P50616   | TOB1 <sup>2</sup>   | UniProtKB:Q6IMN6 | CAPRIN |
| UniProtKB:P31483   | TIA1 <sup>3</sup>   | UniProtKB:Q9BZC1 | CELF4  |
| UniProtKB:P63244   | RACK1 <sup>4</sup>  | UniProtKB:C9JE40 | PATL2  |
| UniProtKB:P10144   | GZMB <sup>5</sup>   | UniProtKB:P60323 | NANOS  |
| UniProtKB:Q12906   | ILF3 <sup>6</sup>   | UniProtKB:P60321 | NANOS  |
| UniProtKB:P24593   | IGFBP5 <sup>7</sup> | UniProtKB:P51114 | FXR1   |
| UniProtKB:P34897   | SHMT2 <sup>8</sup>  | UniProtKB:Q9NZI8 | IGF2BP |
| UniProtKB:P67809   | YBX1 <sup>9</sup>   | UniProtKB:Q8ND56 | LSM14  |
| UniProtKB:P53355   | DAPK1 <sup>10</sup> | UniProtKB:Q2Q1W2 | TRIM71 |
| UniProtKB:Q92574   | TSC1 <sup>11</sup>  | UniProtKB:Q8WU17 | RNF139 |
| UniProtKB:P78543   | BTG2 <sup>12</sup>  | UniProtKB:P19338 | NCL    |
| UniProtKB:P27797   | CALR <sup>13</sup>  | UniProtKB:Q9H2U1 | DHX36  |
| UniProtKB:P04406   | GAPDH <sup>14</sup> | UniProtKB:O43293 | DAPK3  |
| UniProtKB:P06730   | EIF4E <sup>15</sup> | UniProtKB:O00571 | DDX3X  |
| UniProtKB:Q9NRA8   | EIF4ENIF            | UniProtKB:P48200 | IREB2  |
| UniProtKB:O60573   | EIF4E2              | UniProtKB:P00374 | DHFR   |
| UniProtKB:Q9NZJ5   | EIF2AK3             | UniProtKB:P40429 | RPL13A |
| UniProtKB:Q96EH3   | MALSU1              | UniProtKB:P26196 | DDX6   |
| UniProtKB:P19525   | EIF2AK2             | UniProtKB:Q14451 | GRB7   |
| UniProtKB:Q9ULR5   | PAIP2B              | UniProtKB:Q9H9A5 | CNOT1  |
| UniProtKB:Q9BPZ3   | PAIP2               | UniProtKB:O60506 | SYNCR1 |
| UniProtKB:Q8NDQ6   | ZNF540              | UniProtKB:Q9Y2Y8 | PRG3   |
| UniProtKB:Q8NE35   | CPEB3               | UniProtKB:Q9NRR6 | INPP5E |
| UniProtKB:P51116   | FXR2                | UniProtKB:Q00577 | PURA   |
| UniProtKB:Q14011   | CIRBP               | UniProtKB:O14682 | ENC1   |
| UniProtKB:O00425   | IGF2BP3             | UniProtKB:Q92600 | CNOT9  |
| UniProtKB:Q5PRF9   | SAMD4B              | UniProtKB:Q9UFF9 | CNOT8  |
| UniProtKB:Q06787   | FMR1                | UniProtKB:Q6Y7W6 | GIGYF2 |
| UniProtKB:Q9UPU9   | SAMD4A              | UniProtKB:A5YKK6 | CNOT1  |
| UniProtKB:Q9Y6M1   | IGF2BP2             | UniProtKB:P03950 | ANG    |
| UniProtKB:Q9H9Z2   | LIN28A              | UniProtKB:P04818 | TYMS   |
| UniProtKB:Q14444   | CAPRIN1             | UniProtKB:Q9UIV1 | CNOT7  |
| UniProtKB:Q9H4Z3   | PCIF1               | UniProtKB:P38919 | EIF4A3 |
| UniProtKB:Q9BYD1   | MRPL13              | UniProtKB:P23396 | RPS3   |
| UniProtKB:Q8WY41   | NANOS1              | UniProtKB:Q8IZH2 | XRN1   |
| UniProtKB:Q96PZ0   | PUS7                | UniProtKB:P52758 | RIDA   |
| UniProtKB:Q6PKG0   | LARP1               | UniProtKB:P34896 | SHMT1  |
| UniProtKB:P10276   | RARA                | UniProtKB:P07814 | EPRS1  |

**Green: proteins that have the potential in immune regulation**

**Supplemental Table 3. The prediction of the RNA binding sites in RGS2 by HDOCK online software**

| Potential PD-L1-5'-UTR binding sites | Frequency predicted by the top 10 models | Potential HTT binding sites | Frequency predicted by the top 10 models |
|--------------------------------------|------------------------------------------|-----------------------------|------------------------------------------|
| N175                                 | 9                                        | D197                        | 7                                        |
| R176                                 | 9                                        | Q196                        | 6                                        |
| D85                                  | 6                                        | F194                        | 6                                        |
| S179                                 | 5                                        | S81                         | 6                                        |
| N149                                 | 5                                        | W80                         | 5                                        |
| E191                                 | 4                                        | Y92                         | 5                                        |
| R188                                 | 4                                        | R133                        | 5                                        |
| N183                                 | 4                                        | C199                        | 4                                        |
| E182                                 | 4                                        | E193                        | 4                                        |
| Q153                                 | 4                                        | G168                        | 4                                        |
| F152                                 | 4                                        | Q160                        | 4                                        |
| E104                                 | 4                                        | Q126                        | 4                                        |
| E86                                  | 4                                        | P125                        | 4                                        |
| W80                                  | 4                                        | K123                        | 4                                        |
|                                      |                                          | S103                        | 4                                        |
|                                      |                                          | A99                         | 4                                        |
|                                      |                                          | E82                         | 4                                        |

Only those residues predicated by more than 4 times in the top 10 models were listed in the table

Yellow: The residues predicted by more than 5 times

**Supplemental Table 4. Plasmids used in this study**

| No. | Plasmid                                               | Source         |
|-----|-------------------------------------------------------|----------------|
| 1   | pCDNA3.1-HA-E2F1                                      | This study     |
| 2   | pLncKP--HITTT                                         | This study     |
| 3   | pGL3-HITT-Promoter-luc (promoter luciferase reporter) | This study     |
| 4   | pGL3-HITT-Promoter-MT1-luc                            | This study     |
| 5   | pGL3-HITT-Promoter-MT2-luc                            | This study     |
| 6   | pMIR-luc-HITT (Luciferase-HITT reporter)              | This study     |
| 7   | pCDNA3.1-FL (1-2050 nt)                               | This study     |
| 8   | pCDNA3.1-F1 (1-214 nt)                                | This study     |
| 9   | pCDNA3.1-F2 (125-1029 nt)                             | This study     |
| 10  | pCDNA3.1-F3 (1030-2050 nt)                            | This study     |
| 11  | pCDNA3.1-F3-1 (1030-1247 nt)                          | This study     |
| 12  | pCDNA3.1-F3-1.1 (1030-1130nt)                         | This study     |
| 13  | pCDNA3.1-F3-1.2 (1080-1180nt)                         | This study     |
| 14  | pCDNA3.1-F3-1.3 (1130-1230nt)                         | This study     |
| 15  | pCDNA3.1-F3-1.4 (1180-1247nt)                         | This study     |
| 16  | pCDNA3.1-F3-2 (1248-1715nt)                           | This study     |
| 17  | pCDNA3.1-F3-3 (1716-2050nt)                           | This study     |
| 18  | pCDNA3.1-HITT-del(1080-1130nt)                        | This study     |
| 19  | pGL3-3'UTR reporter WT 1.3 kb CD274                   | Addgene#107009 |
| 20  | PGL3-PD-L1-5'-UTR-luc                                 | This study     |
| 21  | PGL3-PD-L1-5'-UTR-(1-36 nt)-luc                       | This study     |
| 22  | PGL3-PD-L1-5'-UTR-(37-108 nt)-luc                     | This study     |
| 23  | PGL3-PD-L1-5'-UTR-(1-36 nt)-MT1-luc                   | This study     |
| 24  | PGL3-PD-L1-5'-UTR-(1-36 nt)-MT2-luc                   | This study     |
| 25  | PGL3-PD-L1-5'-UTR-(1-36 nt)-MT3-luc                   | This study     |

continued

| No. | Plasmid name                                             | Source     |
|-----|----------------------------------------------------------|------------|
| 26  | PGL3-PD-L1-5'-UTR-(1-36 nt)-MT4-luc                      | This study |
| 27  | PGL3-PD-L1-5'-UTR-BS1-MT-luc                             | This study |
| 28  | PGL3-PD-L1-5'-UTR-BS2-MT-luc                             | This study |
| 29  | PGL3-PD-L1-5'-UTR-BS1+2-MT-luc                           | This study |
| 30  | pCDNA3.1-PD-L1-5'-UTR-(1-108 nt)                         | This study |
| 31  | pCDNA3.1-PD-L1-5'-UTR-(1-36 nt)                          | This study |
| 32  | pCDNA3.1-PD-L1-5'-UTR-(1-72 nt)                          | This study |
| 33  | pCDNA3.1-PD-L1-5'-UTR-(37-108 nt)                        | This study |
| 34  | pCDNA3.1-PD-L1-5'-UTR-MT1                                | This study |
| 35  | pCDNA3.1-PD-L1-5'-UTR-MT2                                | This study |
| 36  | pCDNA3.1-PD-L1-5'-UTR-MT3                                | This study |
| 37  | pCDNA3.1-PD-L1-5'-UTR-MT4                                | This study |
| 38  | pCDNA3.1-PD-L1-5'-UTR-BS1-MT                             | This study |
| 39  | pCDNA3.1-PD-L1-5'-UTR-BS2-MT                             | This study |
| 40  | pCDNA3.1-PD-L1-5'-UTR-BS1+2-MT                           | This study |
| 41  | pCDNA3.1-Flag-RGS2                                       | This study |
| 42  | pCDNA3.1-Flag-RGS2-MT1 (K175RR176KS179T)                 | This study |
| 43  | pCDNA3.1-Flag-RGS2-MT2 (F194YQ196RD197A)                 | This study |
| 44  | pCDNA3.1-Flag-RGS2-MT3 (K175RR176KS179T-F194YQ196RD197A) | This study |
| 45  | pGEX6P-1-Flag-RGS2-FL(1-212 aa)                          | This study |
| 46  | pGEX6P-1-Flag-RGS2-N (1-79 aa)                           | This study |
| 47  | pGEX6P-1-Flag-RGS2-C (80-212 aa)                         | This study |
| 48  | pGEX6P-1-Flag-RGS2(W80F)                                 | This study |
| 49  | pGEX6P-1-Flag-RGS2(S81T)                                 | This study |
| 50  | pGEX6P-1-Flag-RGS2(Y92F)                                 | This study |

continued

| No. | Plasmid                             | Source     |
|-----|-------------------------------------|------------|
| 51  | pGEX6P-1-Flag-RGS2(R133K)           | This study |
| 52  | pGEX6P-1-Flag-RGS2(F194Y)           | This study |
| 53  | pGEX6P-1-Flag-RGS2(Q196R)           | This study |
| 54  | pGEX6P-1-Flag-RGS2(D197A)           | This study |
| 55  | pGEX6P-1-Flag-RGS2(W80FS81T)        | This study |
| 56  | pGEX6P-1-Flag-RGS2(F194YQ196RD197A) | This study |
| 57  | pGEX6P-1-Flag-RGS2(D85A)            | This study |
| 58  | pGEX6P-1-Flag-RGS2(N149I)           | This study |
| 59  | pGEX6P-1-Flag-RGS2(K175R)           | This study |
| 60  | pGEX6P-1-Flag-RGS2(R176K)           | This study |
| 61  | pGEX6P-1-Flag-RGS2(S179T)           | This study |
| 62  | pGEX6P-1-Flag-RGS2(K175RR176KS179T) | This study |

**Supplemental Table 5. Primers sequences used for qRT-PCR in this study**

| <b>Name</b> | <b>Forword sequence (5'-3')</b> | <b>Reverse sequence (5'-3')</b> |
|-------------|---------------------------------|---------------------------------|
| HITT        | ACACAAATGCTGGCCTCTGTCA          | GGCAAGTGGCAAAGCCTCTC            |
| PD-L1       | ATGGTGGTGCCGACTACAAG            | GGAATTGGTGGTGGTGGTCT            |
| PD-L1-5'UTR | GGCGCAACGCTGAGCAGC              | CTTTCTGGAATGCCCT                |
| HITT-F1     | GGTCCCTGTCCTCACAGAGTT           | TGTTCTTGTCTATCGTCTTCTTGC        |
| HITT-F2     | AAGGAGGGTAGGAGTCTTGGTC          | CCGAAATAAAGGCAGGAGTGA           |
| HITT-F3     | CCAAAAGGCAAAAGCAGGGTG           | CAGGAAGGCTCTGGCTCAGGAAT         |
| HITT-F3-1   | CTCCCTCTCCTGCCTTTGACCTC         | CTCGTCCTCCCAGATTGATGCTC         |
| HITT-F3-2   | GTAGGGGGTTTCTGTAGTATGAGAC       | GTATTTTGGGGTTCTGTAAATG          |
| HITT-F3-3   | TCTTAGAGAGACCCCTCACCCCTTC       | CGTCCGGCTAATTTTGTGTTTTTA        |
| RGS2        | CTCTACTCCTGGGAAGCCCAA           | TTGCTGGCTAGCAGCTCGTCAA          |
| TOB1        | CTCCATCGCCTCCTTTTGGT            | CCTTGTTGCTACGGCCACTA            |
| TIA1        | GGACGAGATGCCAAGACTC             | GGGGTTGTTGCCCAATTCAC            |
| RACK1       | GGGGTCACTCCCACTTTGTT            | AATCTGCCGTTGTCAGAGG             |
| GZMB        | GATCATCGGGGACATGAGG             | ATGGAGCTTCCCCAACAGTG            |
| ILF3        | AGCCACATAACCCTGGCTTC            | ACAAAACCTGTGTAGCCTGC            |
| IGFBP5      | CCCAATTGTGACCGCAAAGG            | CGTCAACGTACTCCATGCCT            |
| SHMT2       | CTCTTTGTTTTGGGCGGCTC            | GAACTGCCTGTCCTTCTCC             |
| YBX1        | GGGCTTATCCCGCCTGTC              | ACCTTCGTTGCGATGACCTT            |
| DAPK1       | CAGTGGACAGTTTGCGGTTG            | GATGACATTGGGGTGCTGGA            |
| TSC1        | CTGACACACCAAAGCAAGCC            | TCCATTGGGGAGGTAGAGGG            |
| BTG2        | GAGGTGTCCTACCGCATTGG            | CACGTAGTTCTTGGAGGGGC            |
| CALR        | GTACACACTGATTGTGCGGC            | TTCTTGGGTGGCAGGAAGTC            |
| EIF4E       | GTAGCGCACACTTTCTGGA             | CAGAGTGCCCATCTGTTCTGT           |
| 18S         | AACTTTCGATGGTAGTCGCCG           | CCTTGGATGTGGTAGCCGTTT           |

**Supplemental Table 6. Reagents used in this study**

| <b>Reagent</b>                         | <b>Manufacturer</b>       | <b>No</b>   |
|----------------------------------------|---------------------------|-------------|
| PD-L1                                  | Cell Signaling Technology | 13684S      |
| PD-L2                                  | Cell Signaling Technology | 82723S      |
| RGS2                                   | Santa Cruz                | SC-100761   |
| E2F1                                   | Cell Signaling Technology | 3742S       |
| EGR1                                   | Santa Cruz                | SC-189      |
| TAF-1                                  | Proteintech               | 20260-1-AP  |
| Biotin                                 | abcam                     | ab53494     |
| $\alpha$ -tubulin                      | Proteintech               | 66031-1-Ig  |
| $\beta$ -actin                         | Proteintech               | 60008-1-Ig  |
| GAPDH                                  | Proteintech               | 60004-1-Ig  |
| HSP70                                  | Proteintech               | 10995-1-AP  |
| HSP90                                  | Proteintech               | 13171-1-AP  |
| P62                                    | Proteintech               | 18420-1-AP  |
| FLAG                                   | Bio Rad                   | MCA4764     |
| GST                                    | Abclonal                  | AE006       |
| Goat anti-Rabbit IgG                   | Thermo Fisher Scientific  | 31460       |
| Goat anti-Mouse IgG                    | Thermo Fisher Scientific  | 31430       |
| FITC anti-human PD-L1                  | Biolegend                 | 393605      |
| PE-anti-Mouse CD3 $\epsilon$           | Biolegend                 | 100307      |
| PE-Cyanine 7 anti-Mouse IFN- $\gamma$  | Biolegend                 | 505825      |
| Rat anti-mouse CD8 $\alpha$            | BD Pharmingen TM          | 568164      |
| Alexa Fluor 488 anti-human IgG         | Biolegend                 | M1310G05    |
| anti-human IgG (H+L) Alexa Fluor 488   | Thermo Fisher Scientific  | A-11013     |
| anti-mouse CD8 $\alpha$ antibody       | Bio X Cell                | BE0117      |
| anti-mouse PD-1                        | Bio X Cell                | BP0146      |
| anti-human-CD3                         | Biolegend                 | 317326      |
| anti-human-CD28                        | Biolegend                 | 302934      |
| Human IFN- $\gamma$                    | R&D Systems               | 34992       |
| Human IL-2                             | R&D Systems               | 202-IL      |
| Rat IL-2                               | Miltenyi                  | 130-127-428 |
| OVA257-264 peptide                     | Sigma                     | S7951       |
| Duolink In Situ PLA Probe Anti-Rabbit  | Sigma                     | Duo92002    |
| Duolink In Situ PLA Probe Anti-Mouse   | Sigma                     | Duo92004    |
| Duolink In Situ Detection Reagents Red | Sigma                     | Duo92008    |
| mouse CD8+ MicroBeads                  | Miltenyi                  | 130-116-478 |

**Supplemental Table 7. Probe sequences used in this study**

| <b>Probe name</b>             | <b>Sequence (5'-3')</b>                            |
|-------------------------------|----------------------------------------------------|
| HITT-PLA                      | AGGTGGAGGCCATAGACTTGCTGTGTGCAGGGACCAAGACTTAGGGTGGG |
| HITT del(1080-1130 nt)-PLA    | CCGCATCGCTCCCTCTCCTGCCTTTGACCTCCCACAGGGCACCTCCACAT |
| HITT-FISH                     | AGGTGGAGGCCATAGACTTGCTGTGTGCAGGGACCAAGACTTAGGGTGGG |
| PD-L1-5'-UTR-PLA              | GAGAGCTGGTCCTTCAACAGCTGATCATGCAGCGGTACACCTCAGTGTGC |
| PD-L1-5'-UTR(28-36 nt-MT)-PLA | CCGCGTTGCGACTCGTCGACCGCGCAGCCGCGCGGC               |
| PD-L1-5'-UTR-FISH             | GAGAGCTGGTCCTTCAACAGCTGATCATGCAGCGGTACACCTCAGTGTGC |

## References

1. Oliveira-Dos-Santos AJ, Matsumoto G, Snow BE, Bai D, Houston FP, Whishaw IQ, et al. Regulation of T cell activation, anxiety, and male aggression by RGS2. *Proc Natl Acad Sci U S A*. 2000;97(22):12272-7.
2. Hosokawa K, Kajigaya S, Keyvanfar K, Qiao W, Xie Y, Townsley DM, et al. T Cell Transcriptomes from Paroxysmal Nocturnal Hemoglobinuria Patients Reveal Novel Signaling Pathways. *J Immunol*. 2017;199(2):477-88.
3. Meyer C, Garzia A, Mazzola M, Gerstberger S, Molina H, and Tuschl T. The TIA1 RNA-Binding Protein Family Regulates EIF2AK2-Mediated Stress Response and Cell Cycle Progression. *Mol Cell*. 2018;69(4):622-35.e6.
4. Chou WC, Guo Z, Guo H, Chen L, Zhang G, Liang K, et al. AIM2 in regulatory T cells restrains autoimmune diseases. *Nature*. 2021;591(7849):300-5.
5. Golstein P, and Griffiths GM. An early history of T cell-mediated cytotoxicity. *Nat Rev Immunol*. 2018;18(8):527-35.
6. Alriyami M, Marchand L, Li Q, Du X, Olivier M, and Polychronakos C. Clonal copy-number mosaicism in autoreactive T lymphocytes in diabetic NOD mice. *Genome Res*. 2019;29(12):1951-61.
7. Egbeto IA, Garelli CJ, Piedra-Mora C, Wong NB, David CN, Robinson NA, et al. Case Series: Gene Expression Analysis in Canine Vogt-Koyanagi-Harada/Uveodermatologic Syndrome and Vitiligo Reveals Conserved Immunopathogenesis Pathways Between Dog and Human Autoimmune Pigmentary Disorders. *Front Immunol*. 2020;11:590558.
8. Ron-Harel N, Santos D, Ghergurovich JM, Sage PT, Reddy A, Lovitch SB, et al. Mitochondrial Biogenesis and Proteome Remodeling Promote One-Carbon Metabolism for T Cell Activation. *Cell Metab*. 2016;24(1):104-17.
9. Zhao P, Ji MM, Fang Y, Li X, Yi HM, Yan ZX, et al. A novel lncRNA TCLlnc1 promotes peripheral T cell lymphoma progression through acting as a modular scaffold of HNRNP and YBX1 complexes. *Cell Death Dis*. 2021;12(4):321.
10. Chou TF, Chuang YT, Hsieh WC, Chang PY, Liu HY, Mo ST, et al. Tumour suppressor death-associated protein kinase targets cytoplasmic HIF-1 $\alpha$  for Th17 suppression. *Nat Commun*. 2016;7:11904.
11. Shi L, Chen X, Zang A, Li T, Hu Y, Ma S, et al. TSC1/mTOR-controlled metabolic-epigenetic cross talk underpins DC control of CD8<sup>+</sup> T-cell homeostasis. *PLoS Biol*. 2019;17(8):e3000420.
12. Hwang SS, Lim J, Yu Z, Kong P, Sefik E, Xu H, et al. mRNA destabilization by BTG1 and BTG2 maintains T cell quiescence. *Science*. 2020;367(6483):1255-60.
13. Blees A, Janulien D, Hofmann T, Koller N, Schmidt C, Trowitzsch S, et al. Structure of the human MHC-I peptide-loading complex. *Nature*. 2017;551(7681):525-8.
14. Mondragón L, Mhaidly R, De Donatis GM, Tosolini M, Dao P, Martin AR, et al. GAPDH Overexpression in the T Cell Lineage Promotes Angioimmunoblastic T Cell Lymphoma through an NF- $\kappa$ B-Dependent Mechanism. *Cancer Cell*. 2019;36(3):268-87.e10.
15. Yi W, Gupta S, Ricker E, Manni M, Jessberger R, Chinenov Y, et al. The mTORC1-4E-BP-eIF4E

axis controls de novo Bcl6 protein synthesis in T cells and systemic autoimmunity. *Nat Commun.* 2017;8(1):254.
